# Supplementary material for: Odd-paired is a late-acting pioneer factor coordinating with Zelda to broadly regulate gene expression in early embryos
Source: bioRxiv or medRxiv preprint supplement (doi:10.1101/853028), 2019-11-23
Supplement: Supplementary file [file media-1.pdf]

Figure 1 - figure supplement 1

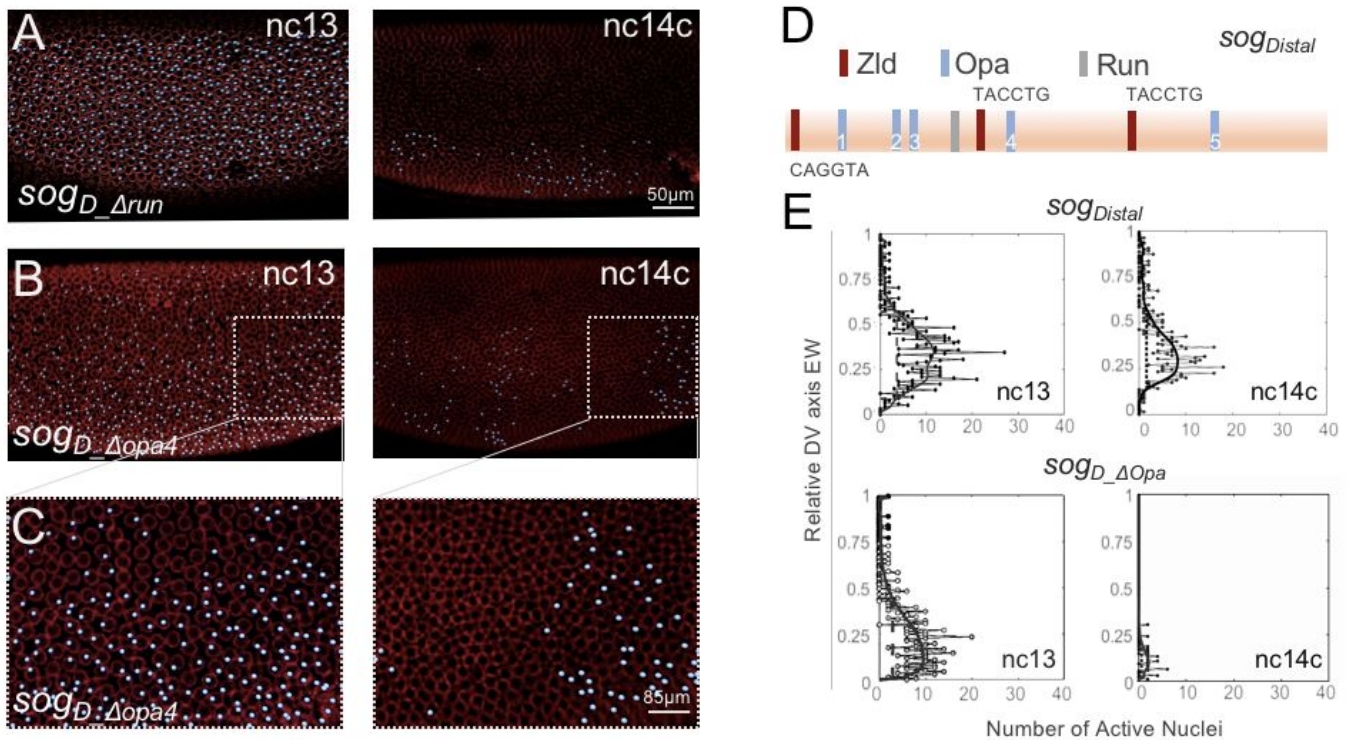

**Figure 1 - figure supplement 1. Assay of *sog\_Distal* expression outputs through live in vivo imaging following mutagenesis of Opa or Run predicted binding sites.**

(A-C) MS2-MCP imaging-based computationally defined dots of nascent transcripts (blue) and nuclear membranes marked by Nup-RFP (red) associated with the *sog<sub>D</sub>Δrun* reporter in which the single Run site (see D) is mutated (Koromila and Stathopoulos, 2019) or the *sog<sub>D</sub>Δopa4* reporter, in which only one Opa binding site, site 4 (D), is mutated. (C) shows magnified views of B; expression is sometimes retained at the posterior of embryos.

(D) 650 bp *sog\_Distal* enhancer sequence showing relative organization of binding sites for transcription factors based on matches to consensus sequences: 3 sites for Zld, 5 sites for Opa, and 1 site for Run. Base-pair sequences for three Zld sites shown, which are direct matches to the consensus. Zld and Run sites were previously mutated and characterized (Foo et al., 2014; Koromila and Stathopoulos, 2019).

(E) Plots of number of active nuclei, defined by counting dots (x-axis) versus relative DV axis embryo-width (EW) position (y-axis), as analyzed for representative stills from nc13 and nc14c. Black dotted traces represent raw counts of active nuclei-dots of MS2-MCP signal (bins represent minimum of four dots) detected throughout embryos containing indicated constructs after projection of scans of particular time points were collapsed along the anterior-posterior (AP) axis and dots counted and binned across the DV axis (EW) (for details see: Koromila and Stathopoulos, 2019). The black line for either *sogDistal* wild-type or mutant construct represents normalization after applying a smoothing curve.

**Figure 1 - supplemental figure 2**

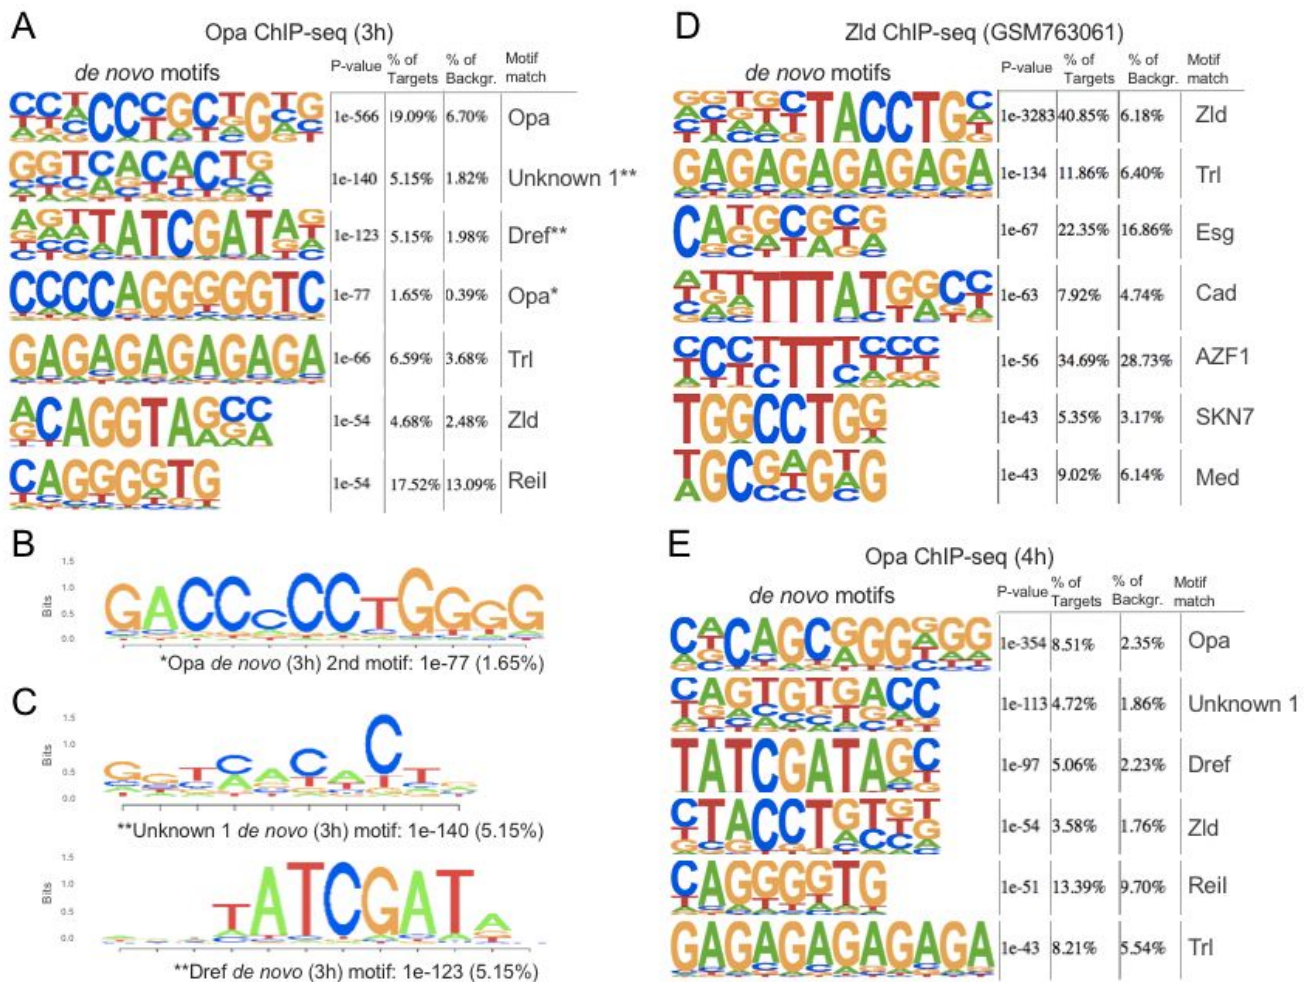

**Figure 1 - supplemental figure 2. Most abundant motifs identified using HOMER *de novo* motif analysis within the two Opa ChIP-seq and Zld ChIP-seq datasets.**

(A) Seven most enriched motifs for Opa (3h) ChIP-seq and Zld (stage 5) ChIP-seq analysis as detected by HOMER. The top identified motifs also shown in Figure 1. A second motif exhibiting extended homology with the JASPAR Opa consensus was identified at lower frequency (see panel B).

(B) Reverse complement of fourth most abundant motifs identified using HOMER within the 3h Opa ChIP-seq dataset, showing extended homology to JASPAR Opa site.

(C) Opa ChIP-seq six most enriched motifs for 4h embryos. The top identified motif shown also in Figure 1J.

**Figure 2 - supplemental table 1**

|                   | <b><u>I. Opa-only</u></b> | <b><u>II. Zld-only</u></b> | <b><u>III. Opa-Zld overlap</u></b> |
|-------------------|---------------------------|----------------------------|------------------------------------|
| <b>Opa-like</b>   | <b>1e-522 (15.97%)</b>    | n.f.                       | <b>1e-43 (4.54%)</b>               |
| <b>Zelda-like</b> | n.f.                      | <b>1e-2833 (55.03%)</b>    | <b>1e-240 (15.05%)</b>             |
| <b>Trl-like</b>   | 1e-12 (6.78%)             | 1e-23 (4.45%)              | <b>1e-76 (10.56%)</b>              |
| <b>Dref-like</b>  | <b>1e-119 (6.08%)</b>     | n.f.                       | 1e-19 (4.13%)                      |
| <b>Cad-like</b>   | n.f.                      | <b>1e-63 (14.18%)</b>      | n.f.                               |
| <b>Unknown 1</b>  | <b>1e-117 (5.93%)</b>     | n.f.                       | <b>1e-33 (2.99%)</b>               |
| <b>Run-like</b>   | 1e-22 (2.51%)             | n.f.                       | n.f.                               |

**Table 1. Abundance of motifs for known transcription factors found by HOMER within the three corresponding sets of peaks.** Each set of peaks (i.e. Opa-only, Zld-only, and Opa-Zld overlap) was independently analyzed by HOMER, and binding site consensus sequences defined independently for the listed transcription factors. If no motif for a certain transcription was designated significant by HOMER within a particular set of peaks, designated not found (n.f.). P-values are shown for enrichment of consensus binding sites within each class; abundance shown in parentheses. Data for a subset of sites are shown in Figure 2.

Figure 2 -supplemental figure 1

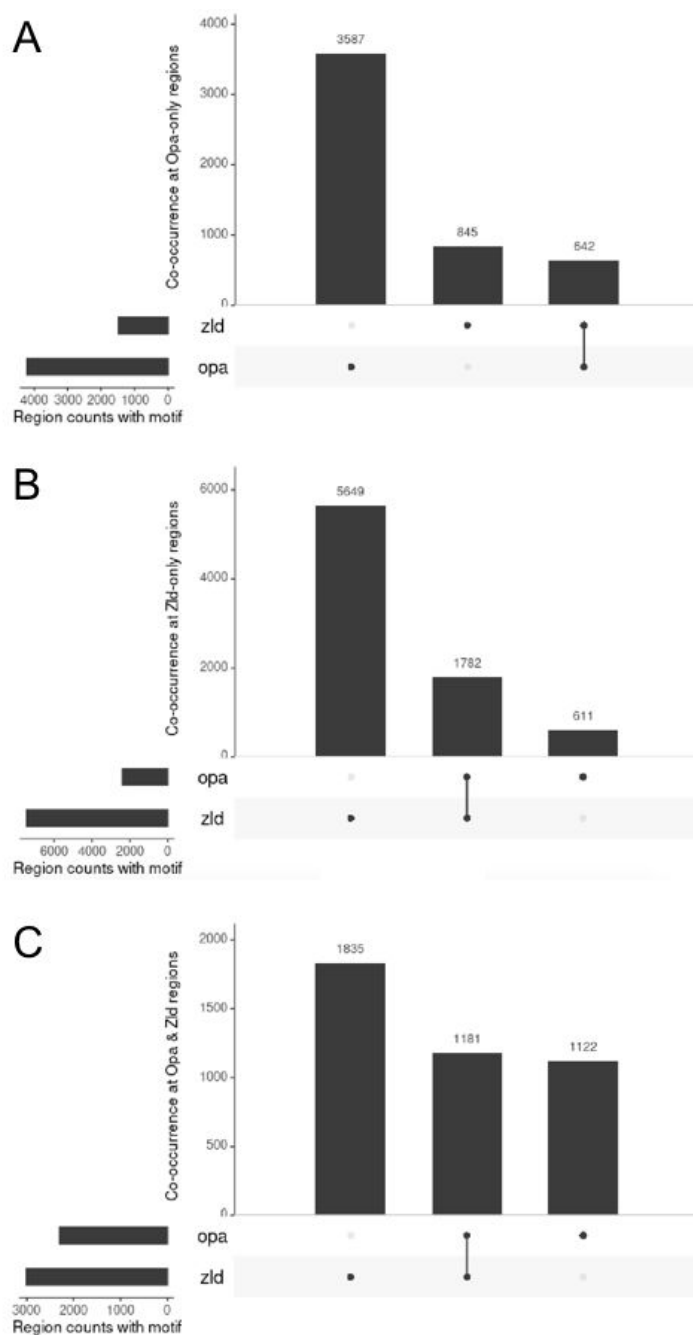

**Figure 2 - supplemental figure 1. Overlap statistics of regions containing Opa and Zld motifs: a novel visualization technique for the quantitative analysis of sets, their intersections, and aggregates of intersections.** (A-C) The UpSet plots showing enrichment of top *de novo* motifs identified from Opa (3h) and Zld (GSM763061) peaks. Motif scanning was performed within  $\pm 500$ bp of the region center.

Each column corresponds to an Opa/Zld set as indicated in Figure 2A-C, and each row corresponds to one segment in the Venn diagram (Figure 2D). Opa-only peaks (A); Zld-only peaks (B); Opa-Zld overlap peaks (C).

**Figure 3 - supplemental figure 1**

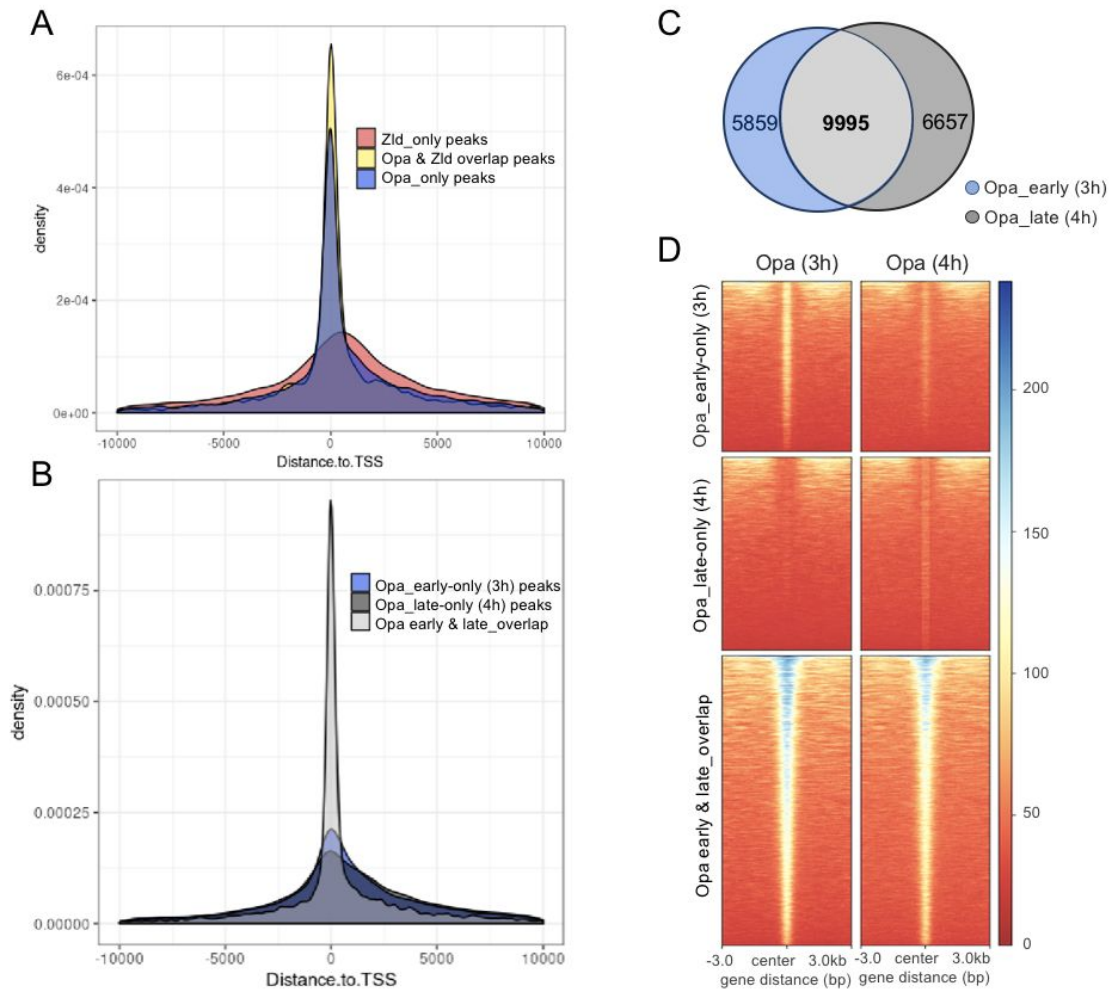

**Figure 3 - supplemental figure 1. Position of peaks relative to transcription start site as well as a comparison of Opa\_early (3h) versus Opa\_late (4h) peak size and overlap.**

(A,B) Histograms showing the distribution of the position of Opa-only, Opa\_Zld overlap and Zld only peaks (A) or Opa\_early only, Opa\_late only, and Opa\_early & late overlap peaks (B) relative to the transcription start site (TSS).

(C) Venn diagram comparing number of Opa\_early (3h) versus Opa\_late (4h) ChIP-seq called peaks.

(D) Heatmaps of normalized ChIP-seq data of Opa-early (3h; left) or Opa-late (4h; right) centered on genomic sequences representing called peaks of one of three classes: Opa\_early only (3h), Opa\_late only

(4h), or Opa early & late overlap. Center of ChIP-seq called peaks are positioned at 0, and extended to 3 kb shown on either side. The size of the peaks is displayed as a color code from blue (largest) to red (smallest). Opa\_early only (3h; top), Opa\_late only (4h; right) ChIP-seq regions split up to illustrate relative size of peaks and enrichment of these DNA regions in the two ChIP-seq samples. Key indicates normalized signal intensities (see Methods) around different ChIP-seq regions.



**Figure 4 - supplemental figure 1**

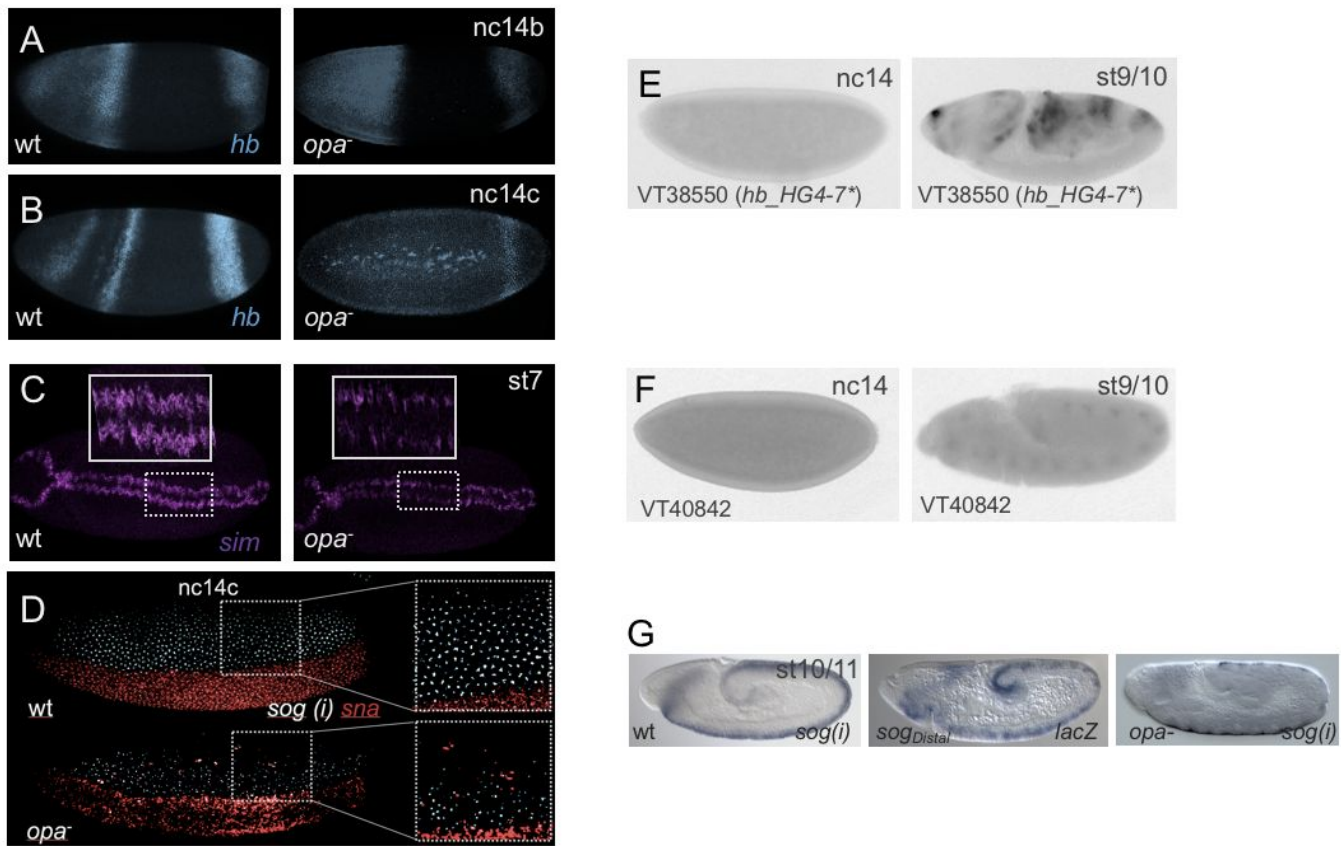

**Figure 4 - supplemental figure 1. *opal* mutants exhibit broad patterning defects affecting DV as well as AP patterning.** In situ hybridization using riboprobes to detect transcripts for *hb* (blue; A,B), *sim* (purple; C), *sna* (red; D), intronic *sog* [*sog(i)*] (blue; D), and *lacZ* (E,F,G) or *sog(i)* (G) in *Drosophila* embryos at the indicated stages.

(A,B) *hb* expression in wt embryos compared to *opa*<sup>-</sup> mutant embryos at two stages: nc14b and nc14c.

(C) *sim* expression in wt embryos compared to *opa*<sup>-</sup> mutant embryos at stage 7.

(D) *sog(i)* and *sna* expression in wt embryos compared to *opa*<sup>-</sup> mutant embryos at nc14c.

(E,F) Data from publicly available genome-scale enhancer characterization (Kvon et al., 2014) demonstrating late expression (stage 9/10) for *hb\_GH4-7* enhancer associated with *hb* locus and VT40842 enhancer associated with *sim* locus.

(G) *sog(i)* expression in wt embryo at stage 10/11 (left) is comparable to expression supported by the *sog\_Distal* enhancer in embryos (middle) at this same stage; whereas *sog(i)* expression is diminished in *opa<sup>1</sup>* mutant embryo (right).

Figure 4 - supplemental figure 2

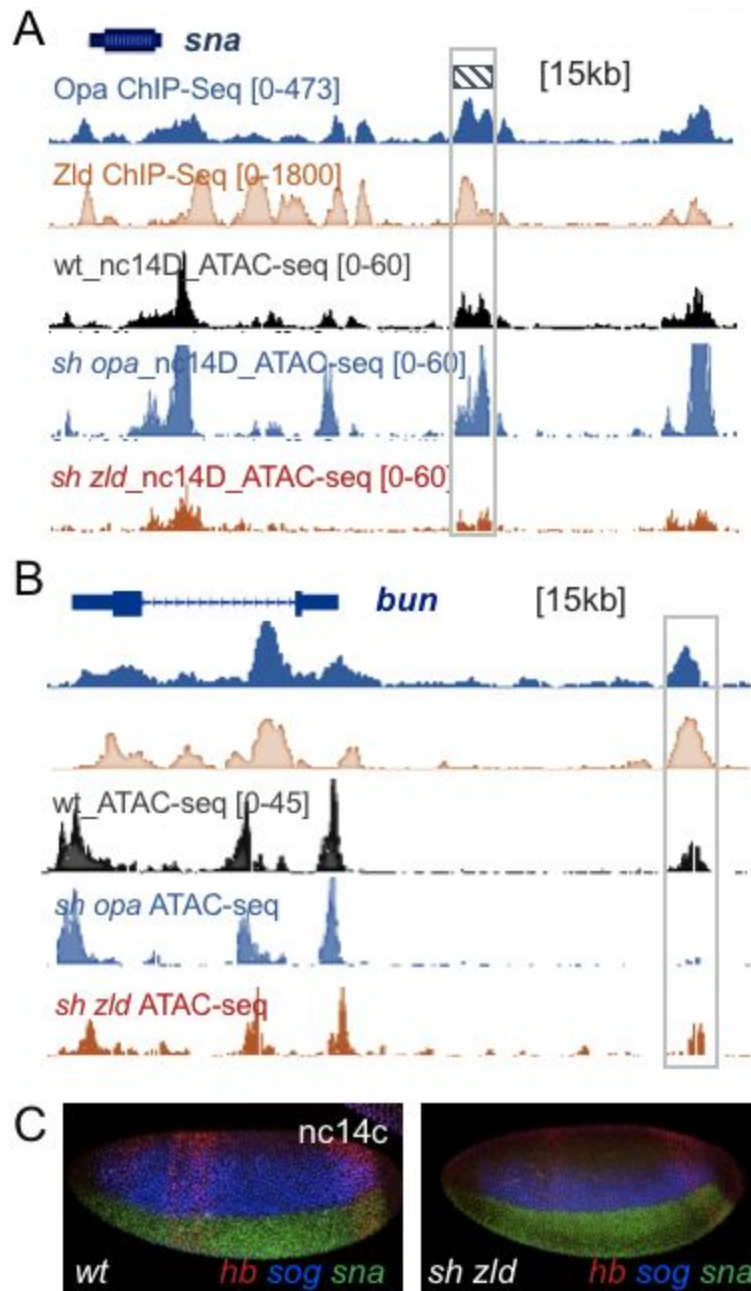

Figure 4 - supplemental figure 2. Additional examples of ATAC-seq data showing differences in chromatin accessibility in response to Opa or Zld RNAi.

(A,B) UCSC dm6 genome browser tracks of representative loci showing single replicates of stage 5 single embryo normalized ATAC-seq data in comparison to Opa and Zld ChIP-seq (stage 5). (A) Examples of an enhancer region, associated with gene *snail* (*sna*) that exhibits decreased accessibility in *sh zld*,

compared to wt, but exhibit no decrease in *sh opa* at nc14D. (B) Another example of an enhancer region associated with the gene *bunched* (*bun*) that exhibits decreased accessibility in *sh opa* but little change in *sh zld* at nc14B. Enhancer regions of focus are defined by gray boxes.

(C) In situ hybridization using riboprobes to detect transcripts for *hb* (red), *sog* (blue), *sna* (red; D), in *Drosophila* embryos, wt or *sh zld*, at nc14c.

Figure 5 - supplemental figure 1

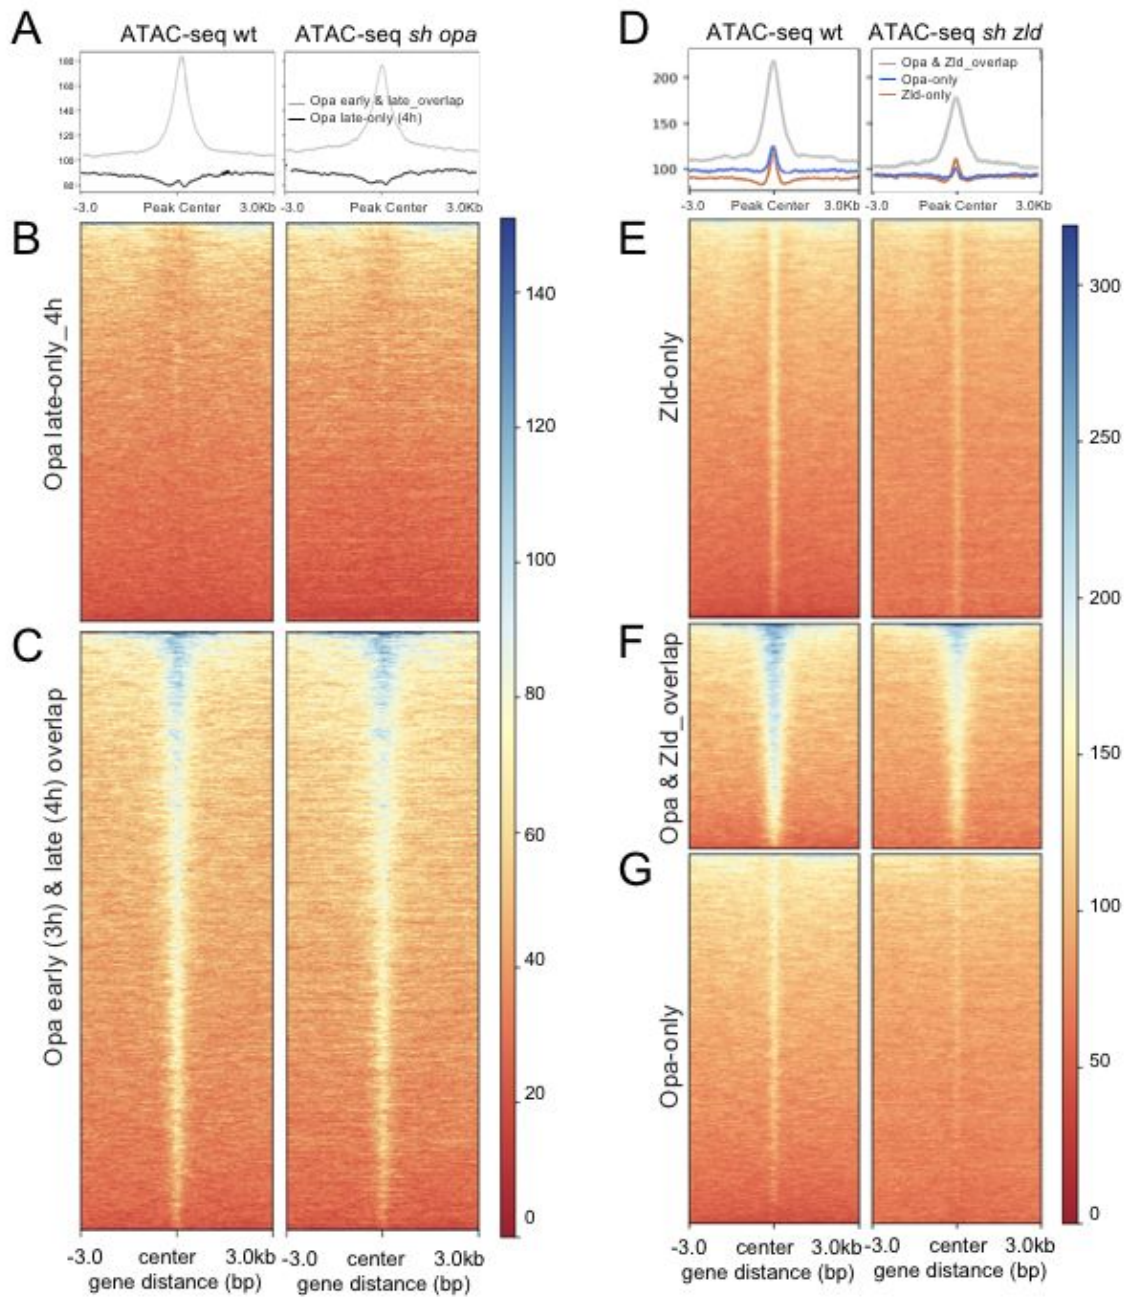

Figure 5 - supplemental figure 1. ATAC-seq data for late-nc14 does not detect change in chromatin accessibility at sites of late Opa (4h) ChIP-seq regions but does confirm role for Zld at sites of early Opa (3h) ChIP-seq regions.

(A-C) Aggregated signals and heatmaps of normalized ATAC-seq data from wt and *sh opa* mutant embryos for ChIP-seq Opa (4hr) Opa-only regions (top) compared to peaks in common between

Opa\_early and Opa\_late peaks called from ChIP-seq Opa-only (3hr) versus ChIP-seq Opa-only (4h) regions. Each line of the heatmap is a genomic region. The accessibility is summarized with a color code from red (no accessibility) to blue (maximum accessibility).

(D-G) Aggregated signals and heatmaps of late nc14 normalized ATAC-seq data from wt and *sh zld* mutant embryos for Zld-only (E; red trace, D), Zld & Opa overlap (F; gray trace, D) and Opa-only (G; blue trace, D). Another plot, on top of the heatmap, shows the mean signal at the genomic regions, which were centered to peaks of accessibility signals (D).

**Movie 1. Visualization of *sogD\_Δopa* transcriptional activities in early embryo from nc12 to gastrulation u.**
